# Supplementary material
Source: PubMed Central journal article supplement (PMC3341076)
Supplement: 1107281109_pnas.1107281109_SI.pdf [file 1107281109_pnas.1107281109_SI.pdf]

# Supporting Information

Leduc et al. 10.1073/pnas.1107281109

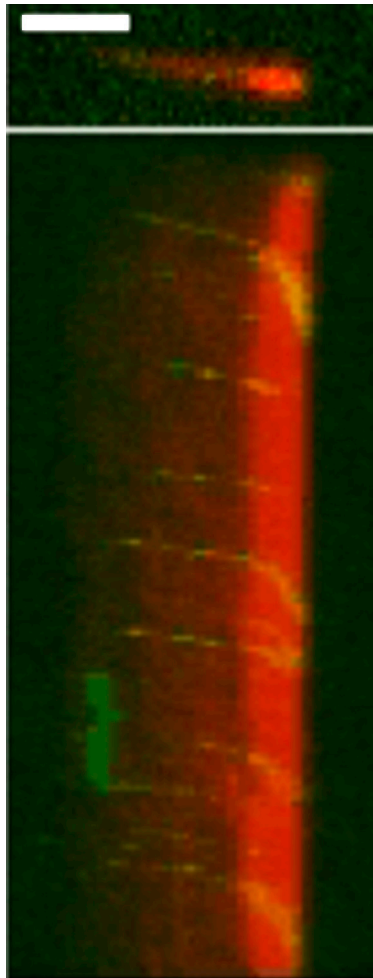

**Movie S1.** Formation of a traffic jam of Kip3 motors on a microtubule.

[Movie S1 \(AVI\)](#)
